# Supplementary material for: Facile synthesis of ZnAl2O4nanoparticles: efficient and reusable porous nano ZnAl2O4and copper supported on ZnAl2O4catalysts for one pot green synthesis of propargylamines and imidazo[1,2-a]pyridines by A3coupling reactions
Source: Royal Society of Chemistry journal article supplement (doi:10.1039/c5ra20812b), 2015-12-22

Supplementary Information

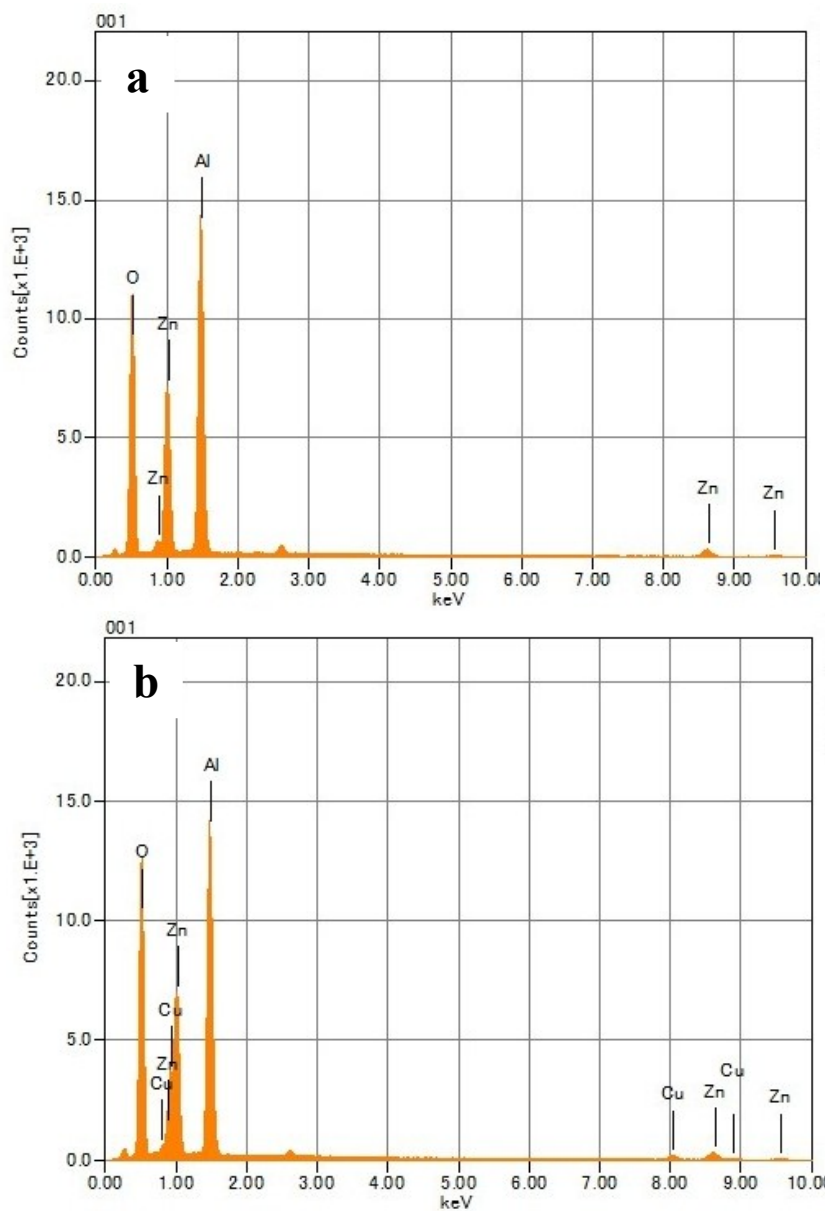

Fig. (a) EDX spectrum of ZAO5 and (b) EDX spectrum of Cu/ZAO5

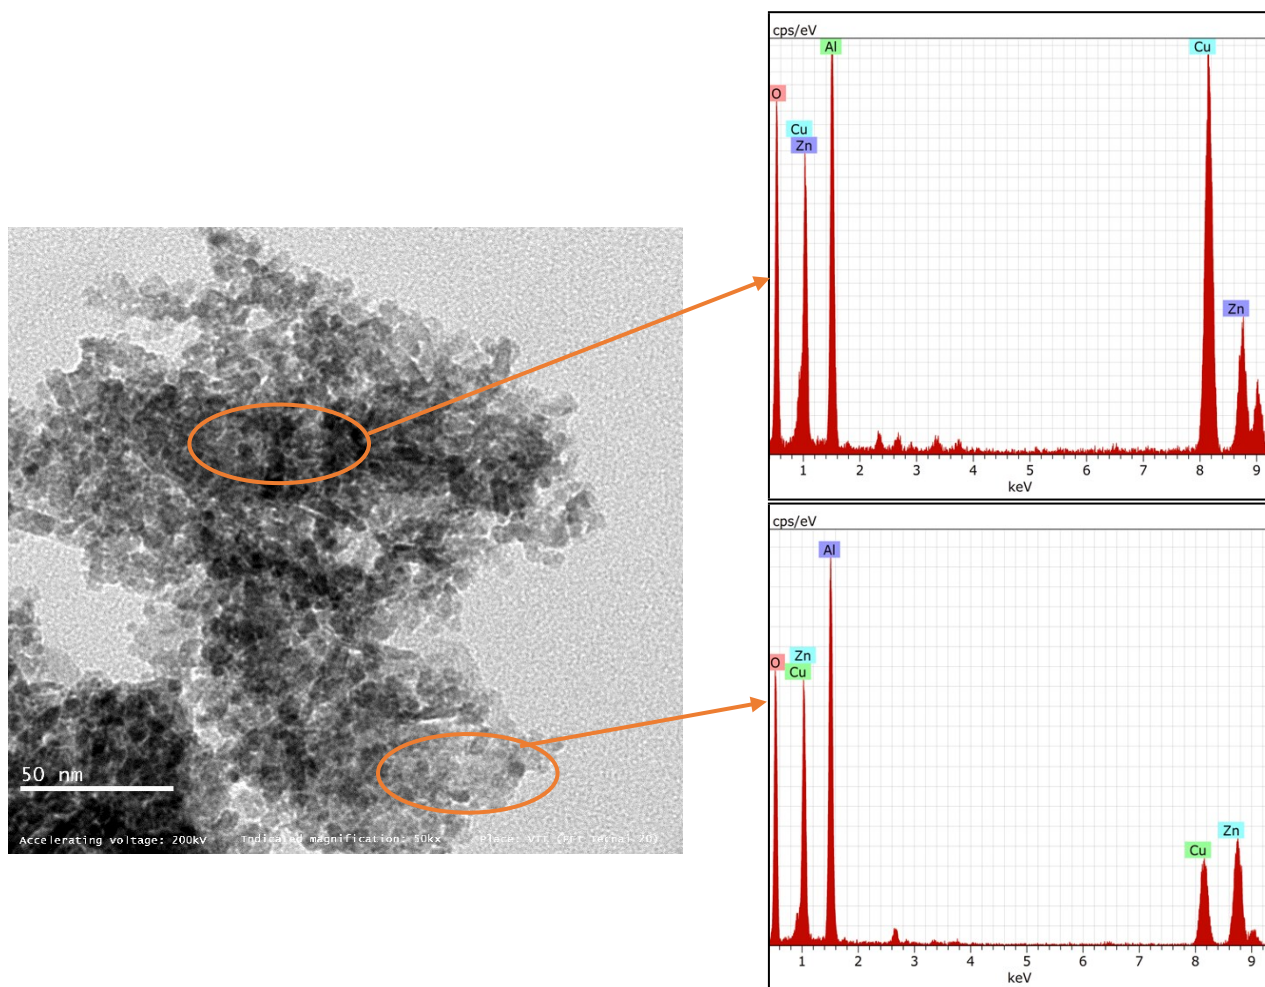

Fig. TEM-EDX of Cu/ZAO5

# GC – MS data

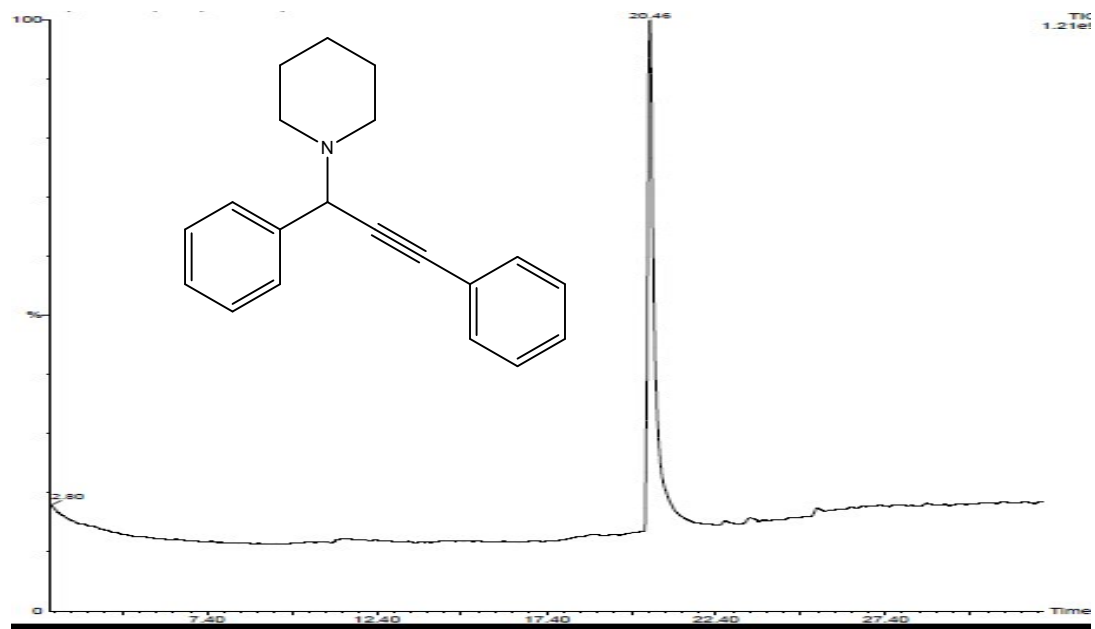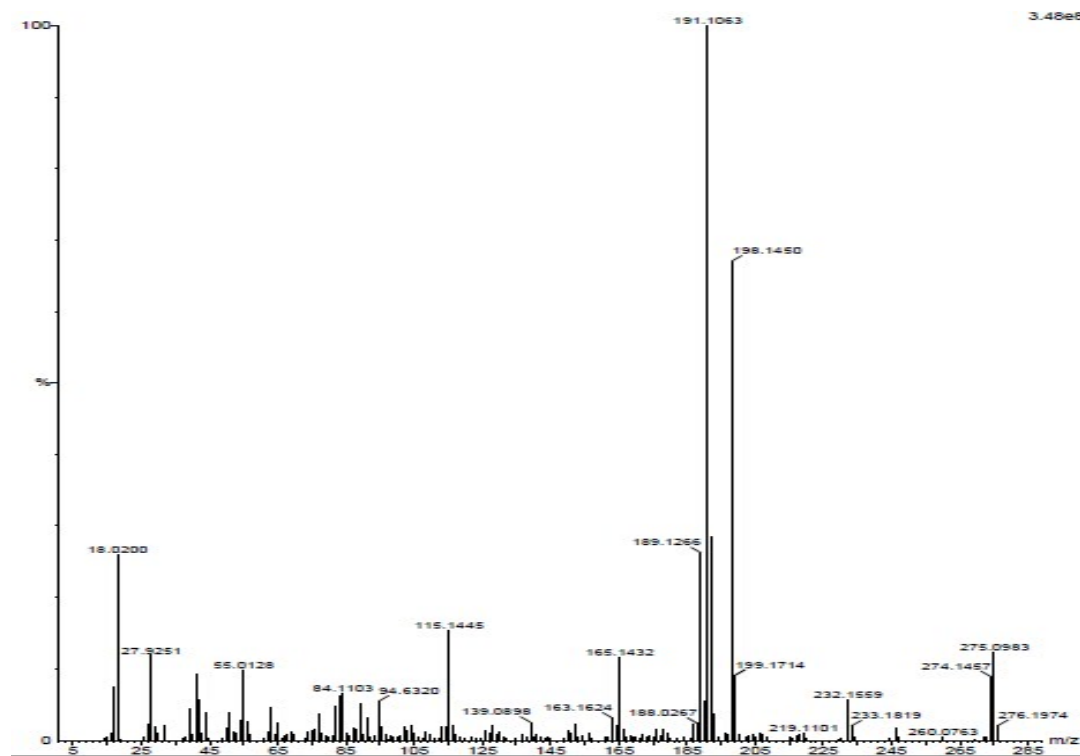

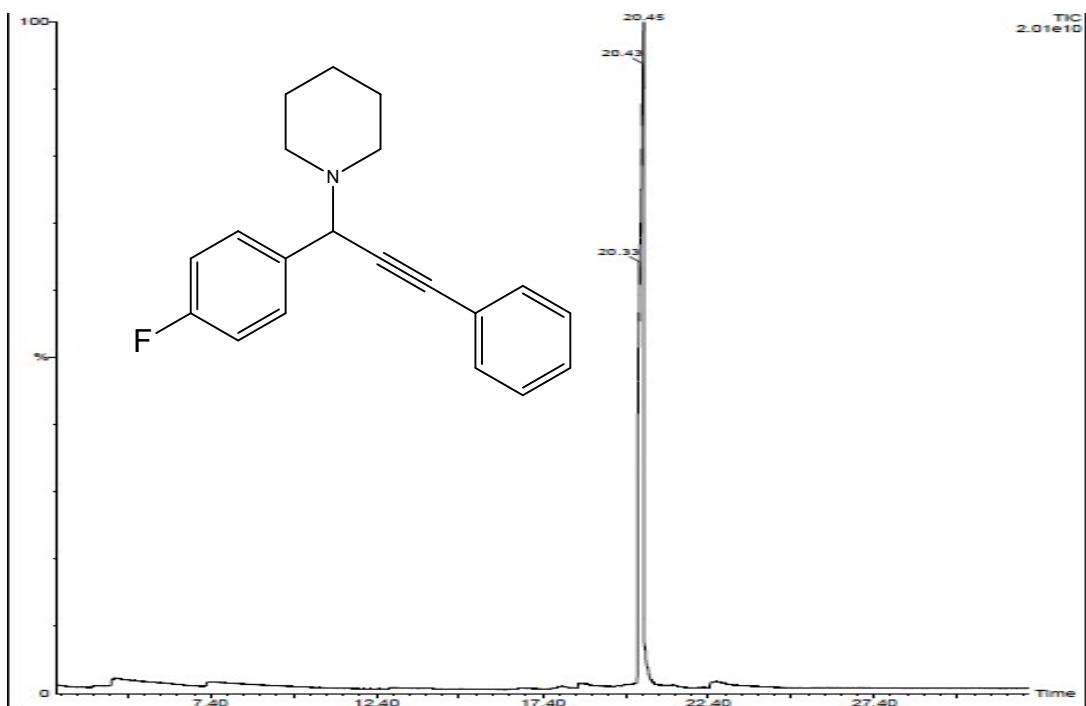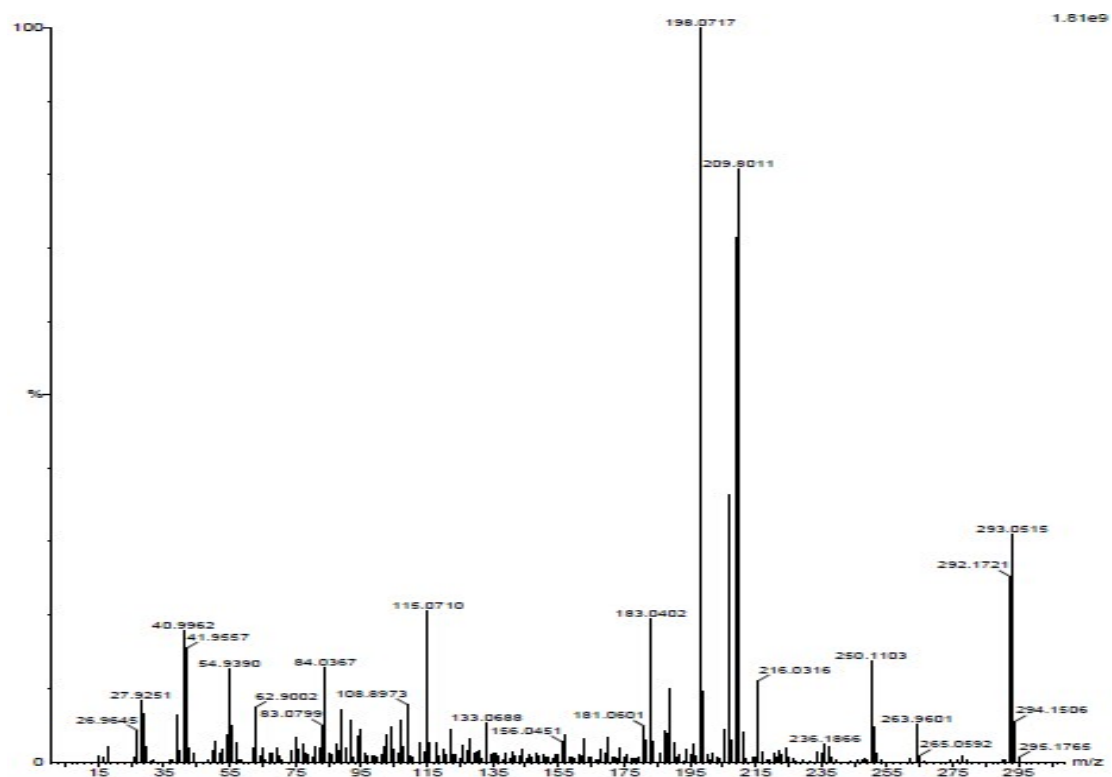

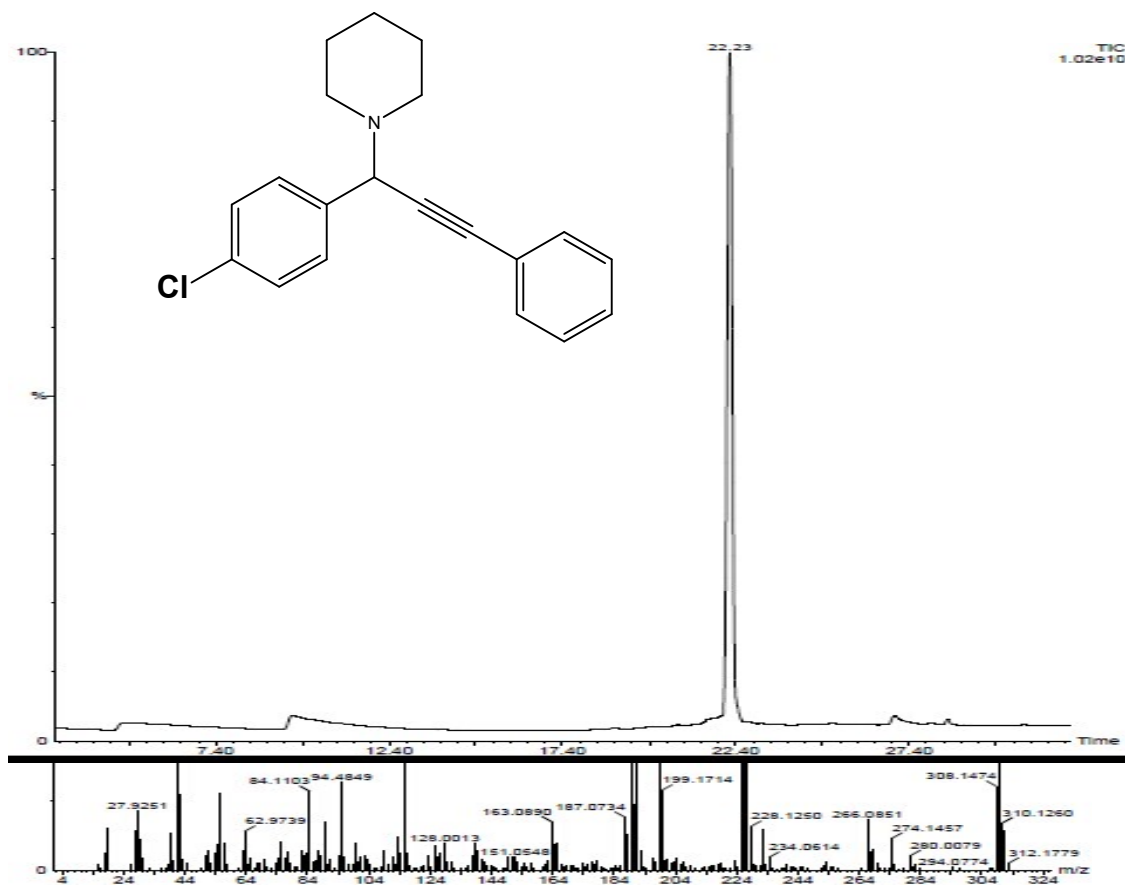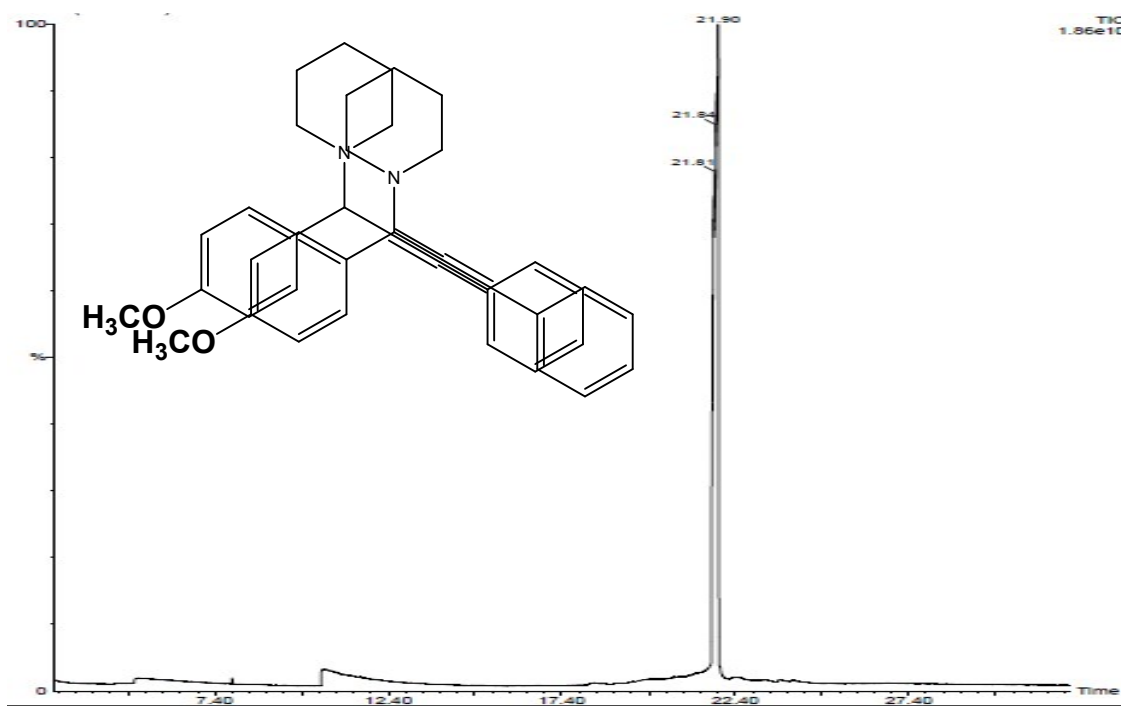

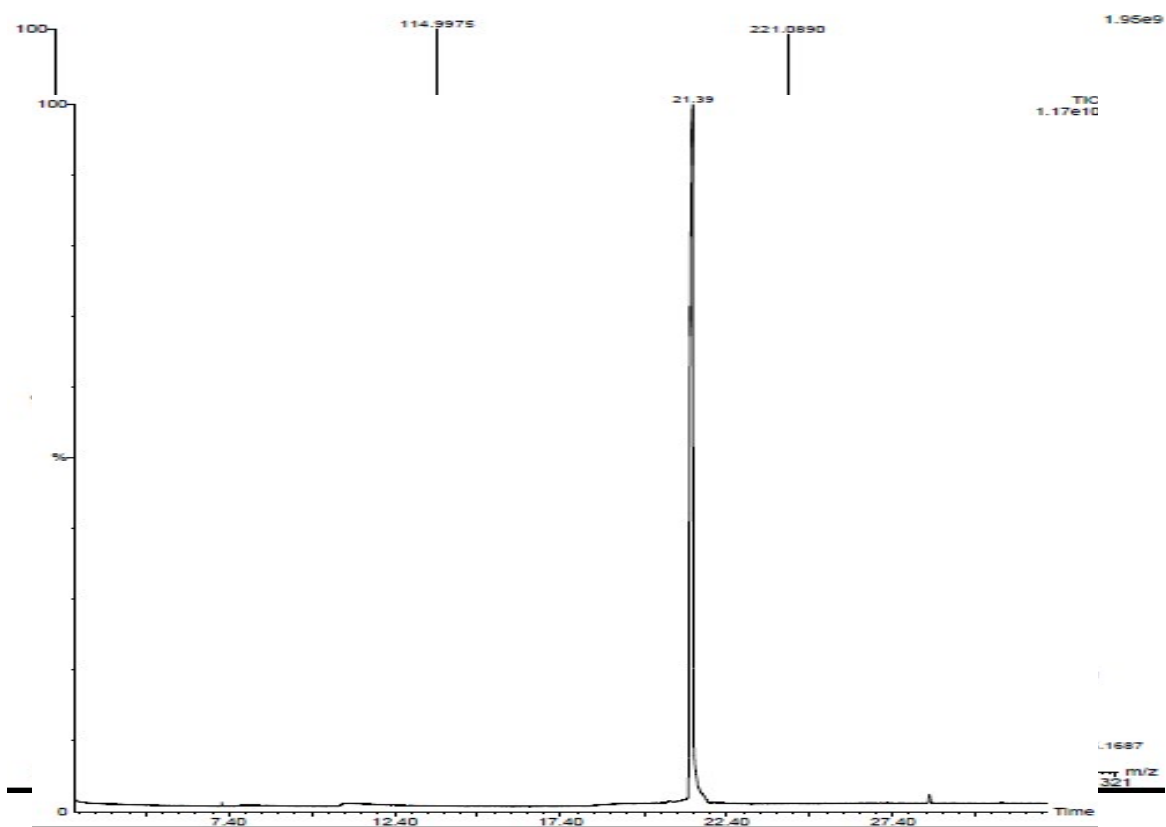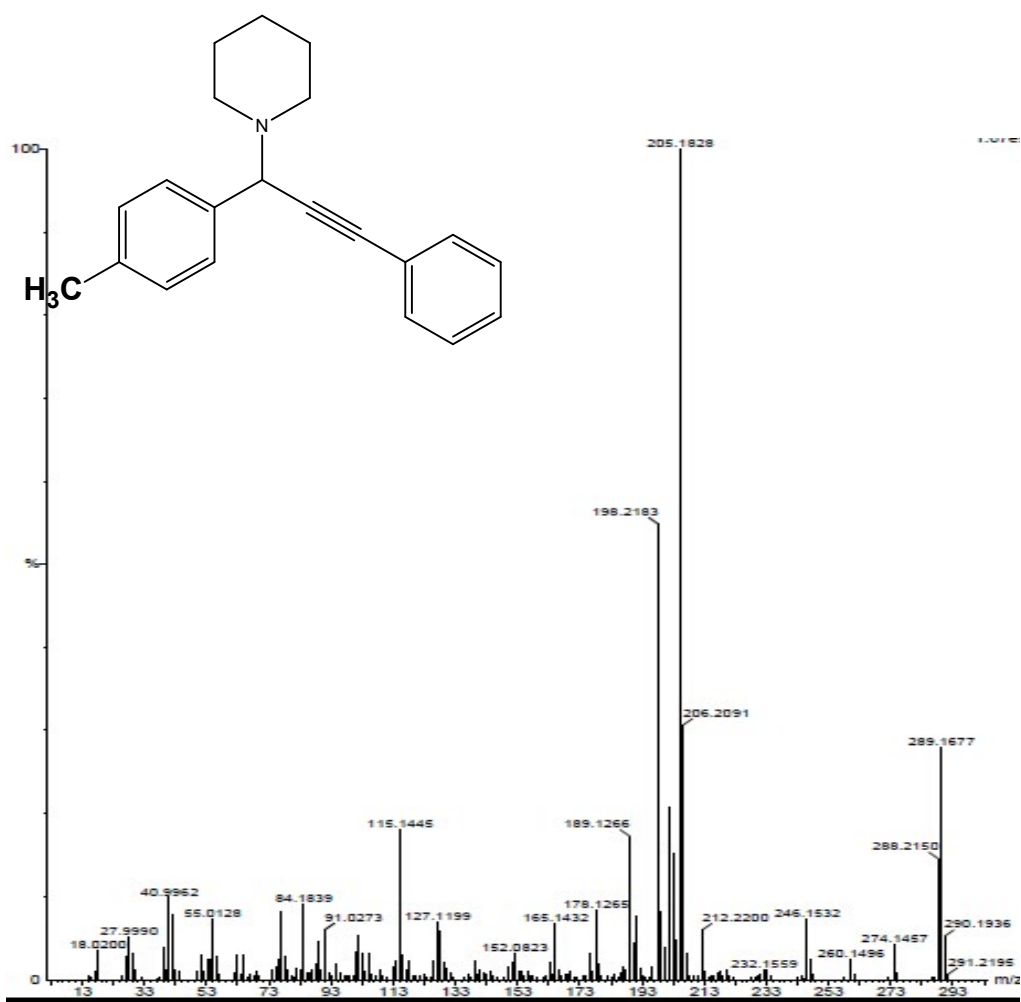

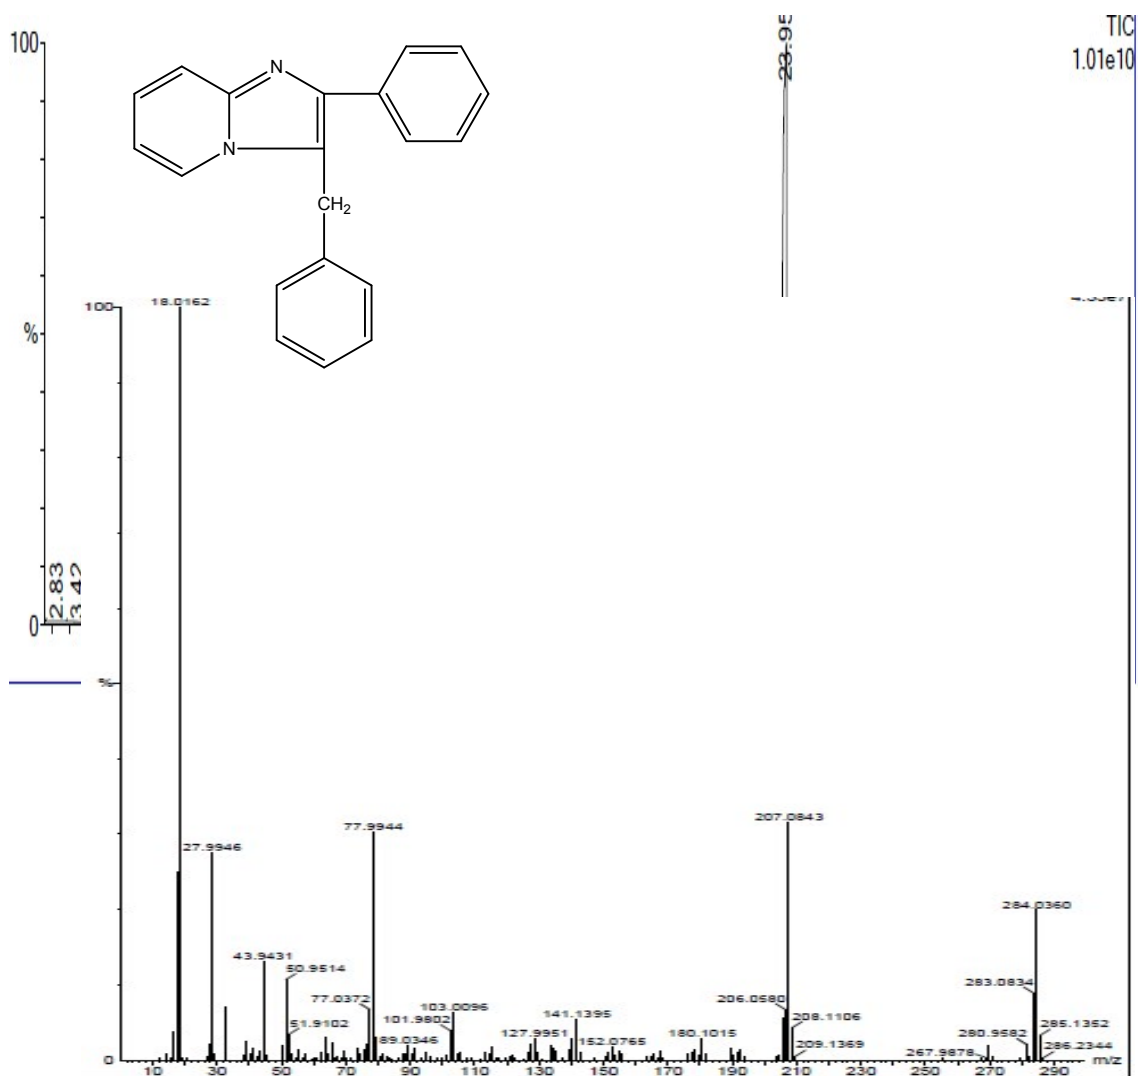

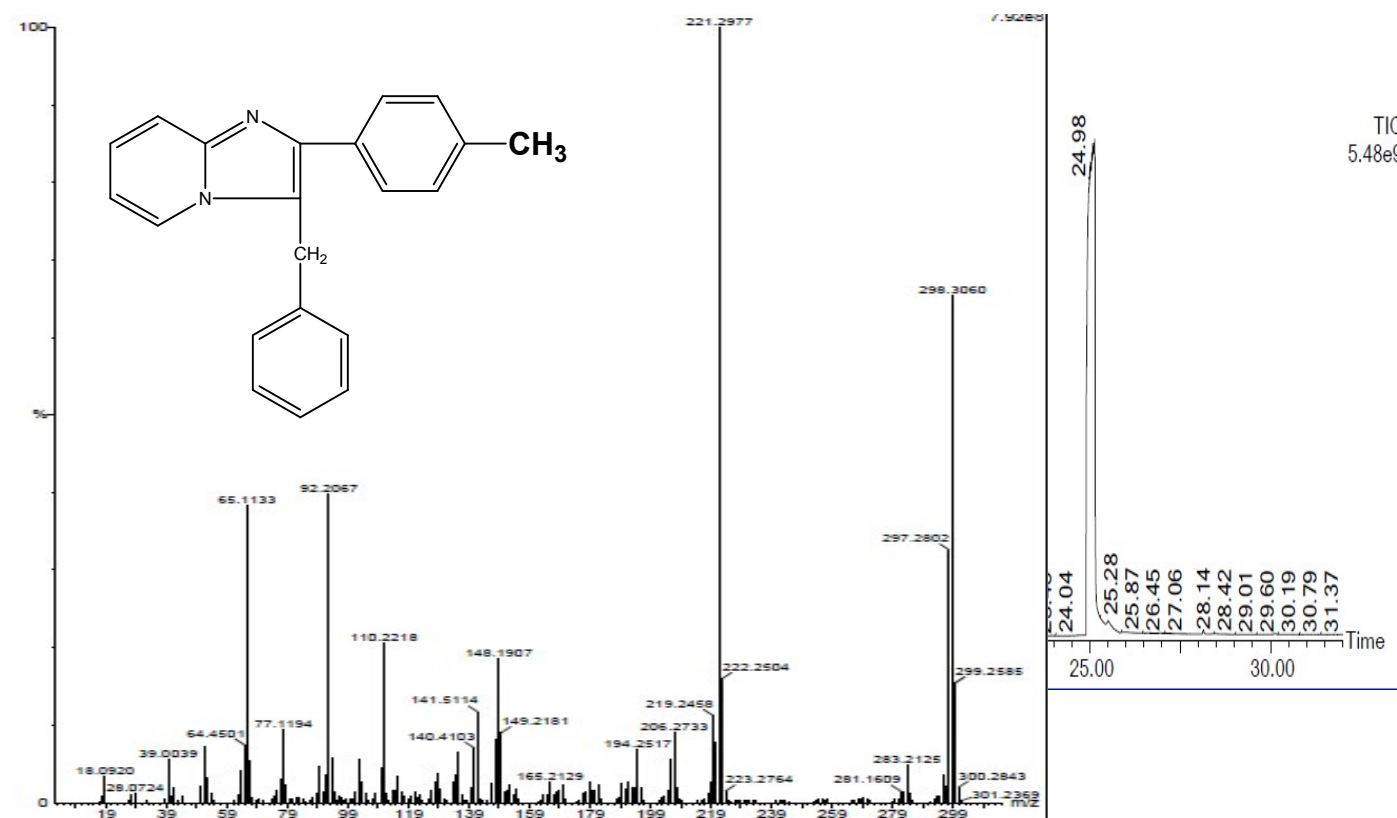

Supplement: c5ra20812b1.pdf [file c5ra20812b1.pdf]
